# Supplementary material
Source: Springer Nature journal article supplement (https://www.springermedizin.de/resource/supplementary/13026_2006_7_MOESM2_ESM.pdf/9644458)

Severity of Somatic Dysfunction (Severity Index)

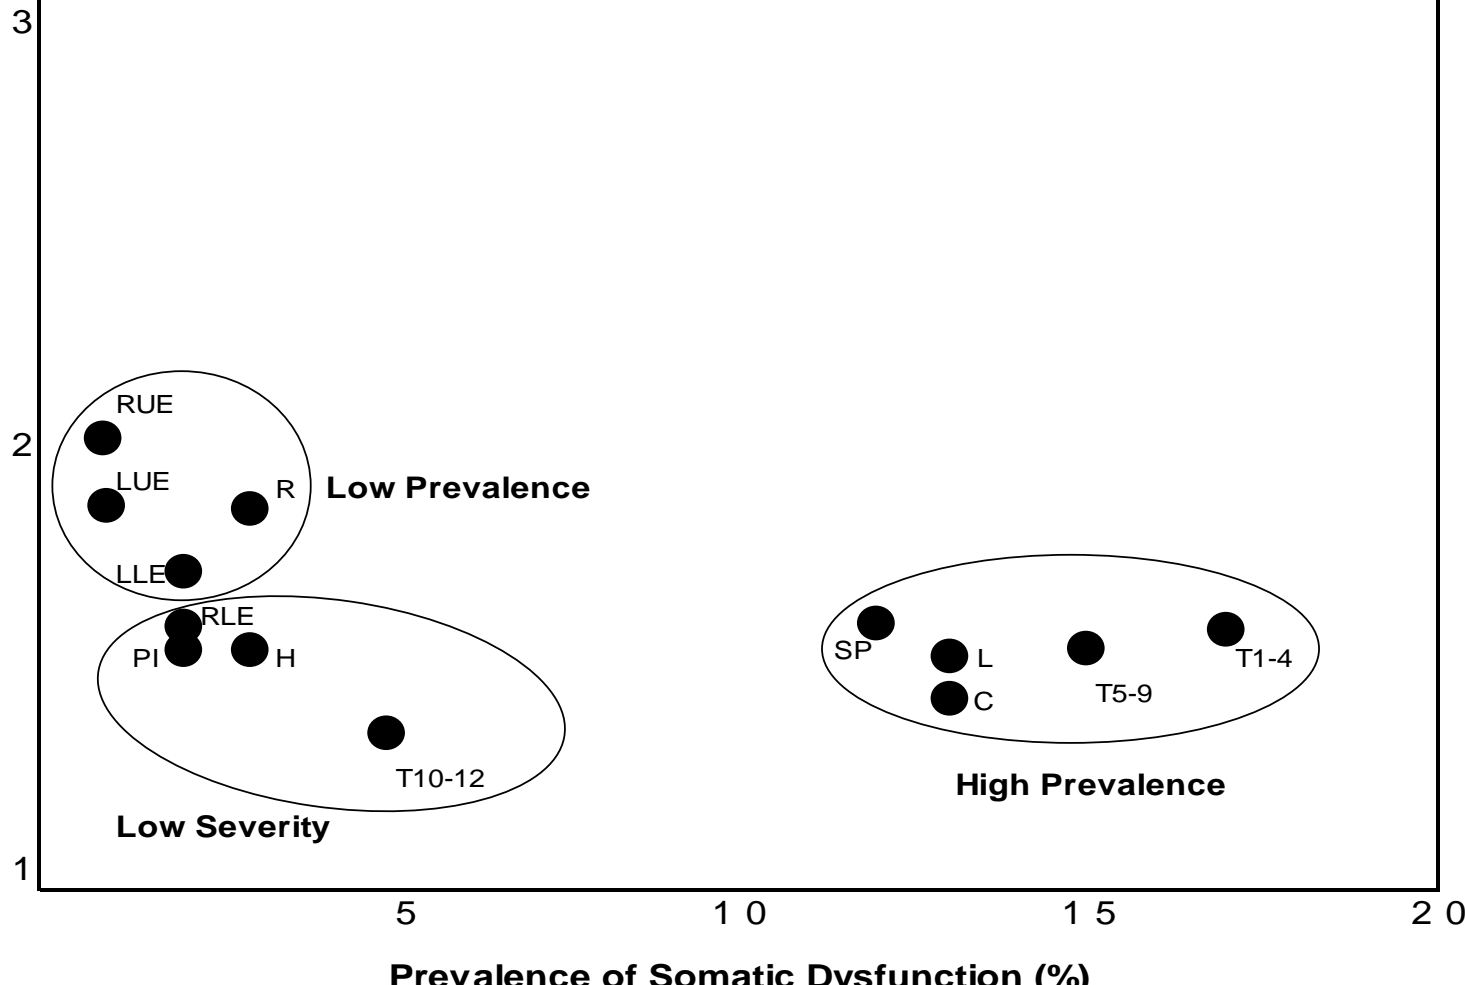

Supplement: MOESM2 [file 9644458]
